# Supplementary material for: Water-proof and thermally inert flexible pressure sensors based on zero temperature coefficient of resistance hybrid films
Source: Royal Society of Chemistry journal article supplement (doi:10.1039/c9tc02832c), 2019-01-01
Supplement: c9tc02832c1.pdf [file c9tc02832c1.pdf]

## Supporting Information

### Water-proof and thermal-inert flexible pressure sensors based on zero temperature coefficient of resistance hybrid films

Zhiyi Gao,<sup>a,b</sup> Kai Jiang,<sup>c</sup> Zheng Lou,<sup>b</sup> Wei Han,<sup>a\*</sup> Guozhen Shen<sup>b\*</sup>

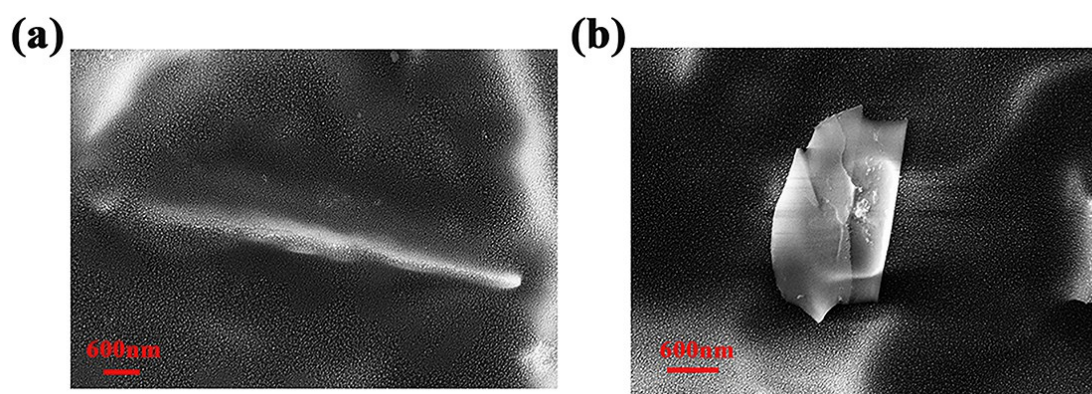

Figure S1 (a, b) High-magnification SEM image of thin film.

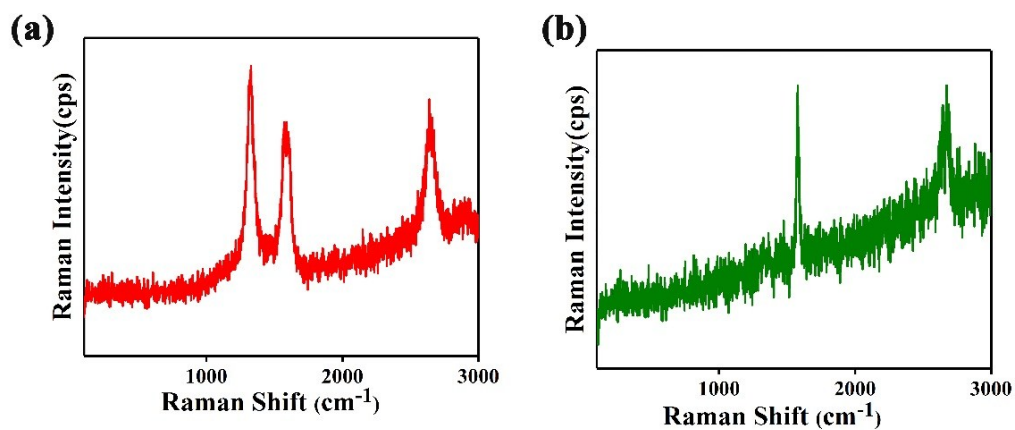

Figure S2 (a) Raman spectra of the MWCNT. (b) Raman spectra of the GP.

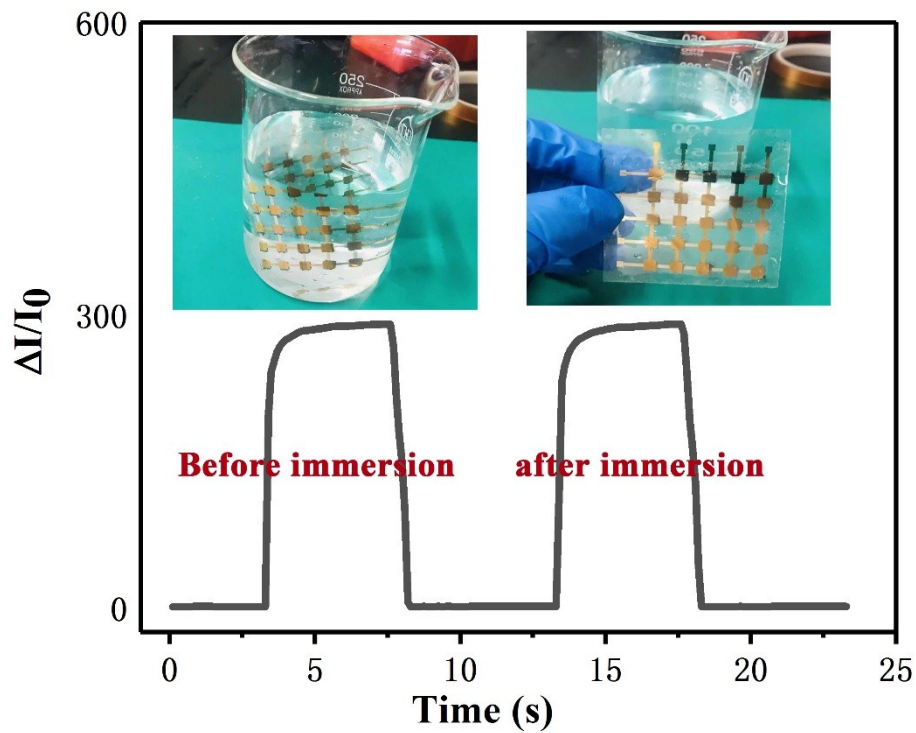

**Figure S3** Pressure comparison of sensors before and after immersion in water

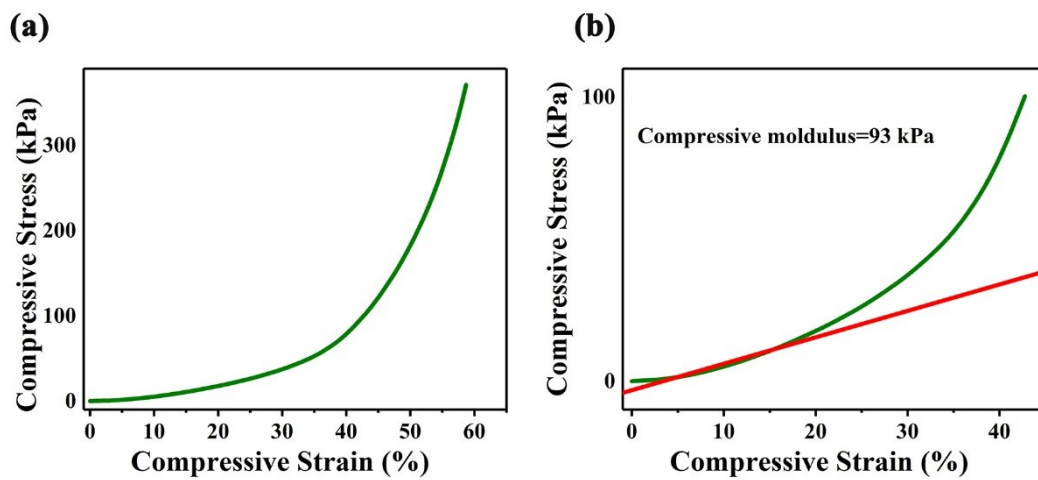

**Figure S4** The compression stress–strain curves of the thin film in the strain ranges of a) 0-60% and b) 0-40%.

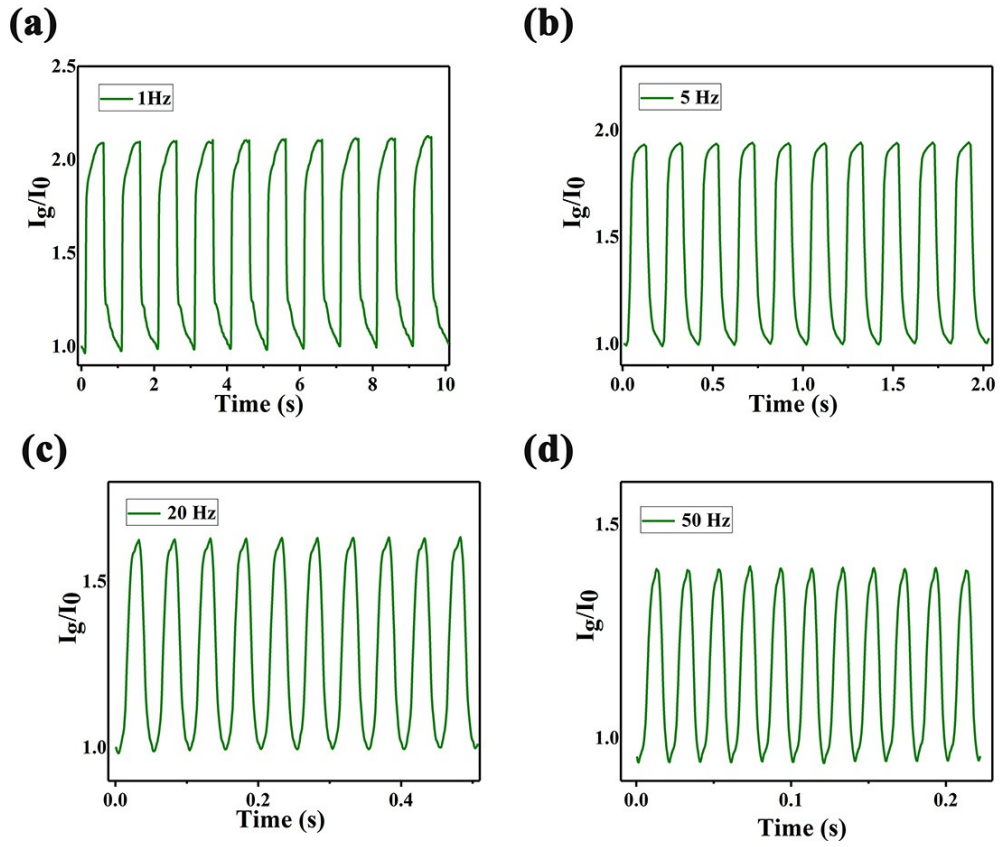

**Figure S5** Real-time relative to current signal recorded under a pressure of 1 kPa when the frequency were 1Hz (a), 5 Hz (b), 20 Hz (c) and 50 Hz (d).

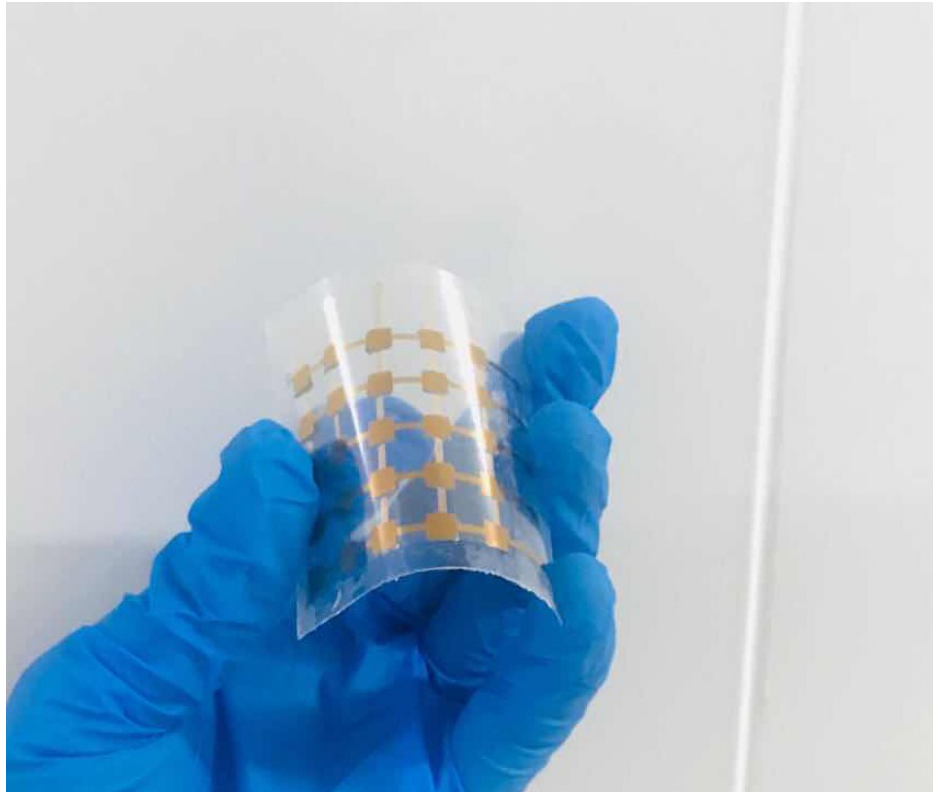

**Figure S6** Optical image of the bending pressure sensor array
